# Supplementary material for: Embryonic Stem Cell Culture Conditions Support Distinct States Associated with Different Developmental Stages and Potency
Source: PubMed Central journal article supplement — Stem Cell Reports. 2016 Aug 9;7(2):177–91. doi: 10.1016/j.stemcr.2016.07.009 (PMC4983099; doi:10.1016/j.stemcr.2016.07.009), 2016-08-09
Supplement: mmc1.pdf [file mmc1.pdf]

**Stem Cell Reports, Volume 7**

**Supplemental Information**

**Embryonic Stem Cell Culture Conditions Support Distinct States Associated with Different Developmental Stages and Potency**

**Javier Martin Gonzalez, Sophie M. Morgani, Robert A. Bone, Kasper Bonderup, Sahar Abelchian, Cord Brakebusch, and Joshua M. Brickman**

Figure S1  
 Martin-Gonzalez et al., 2015

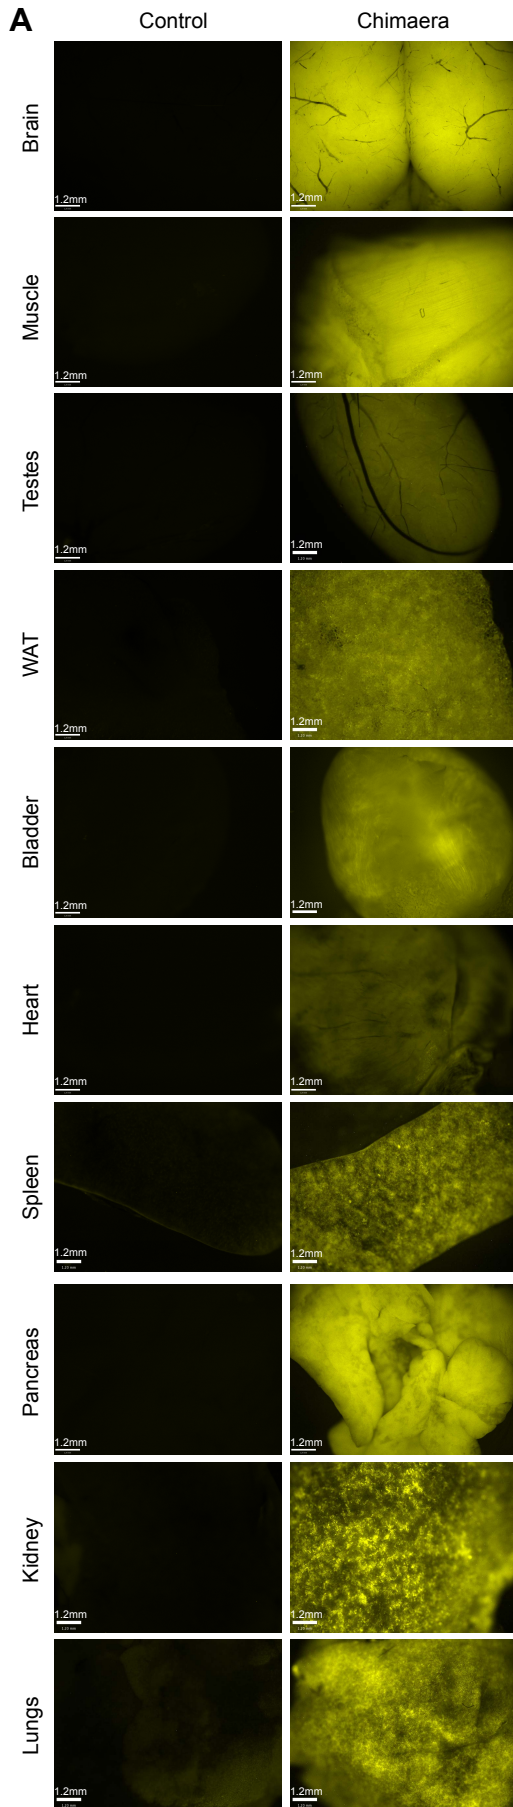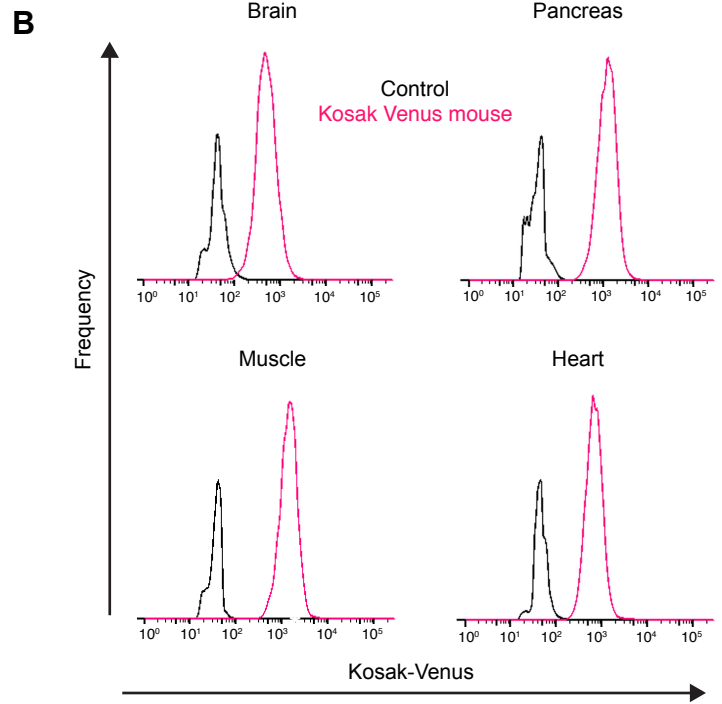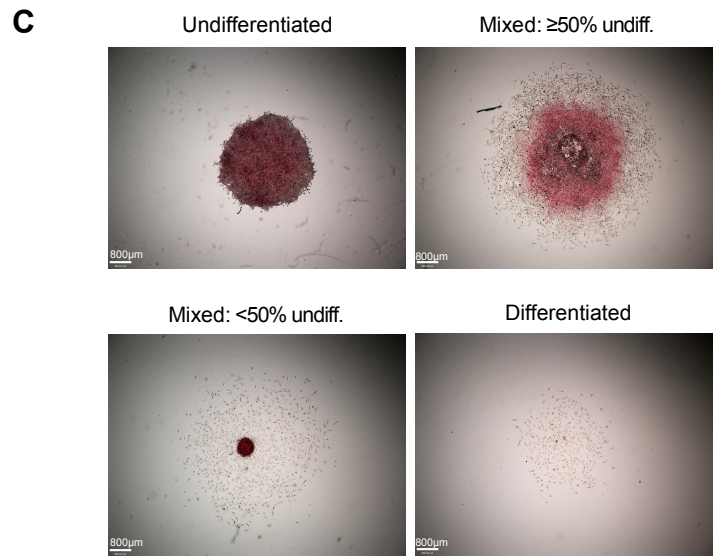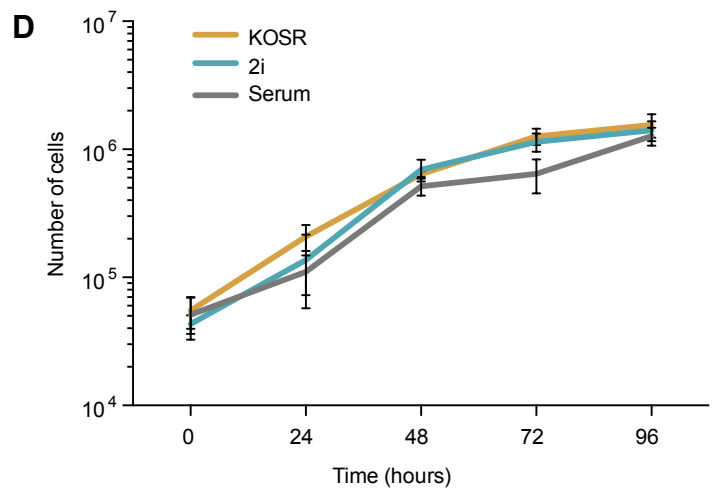

Figure S2  
Martin-Gonzalez et al., 2015

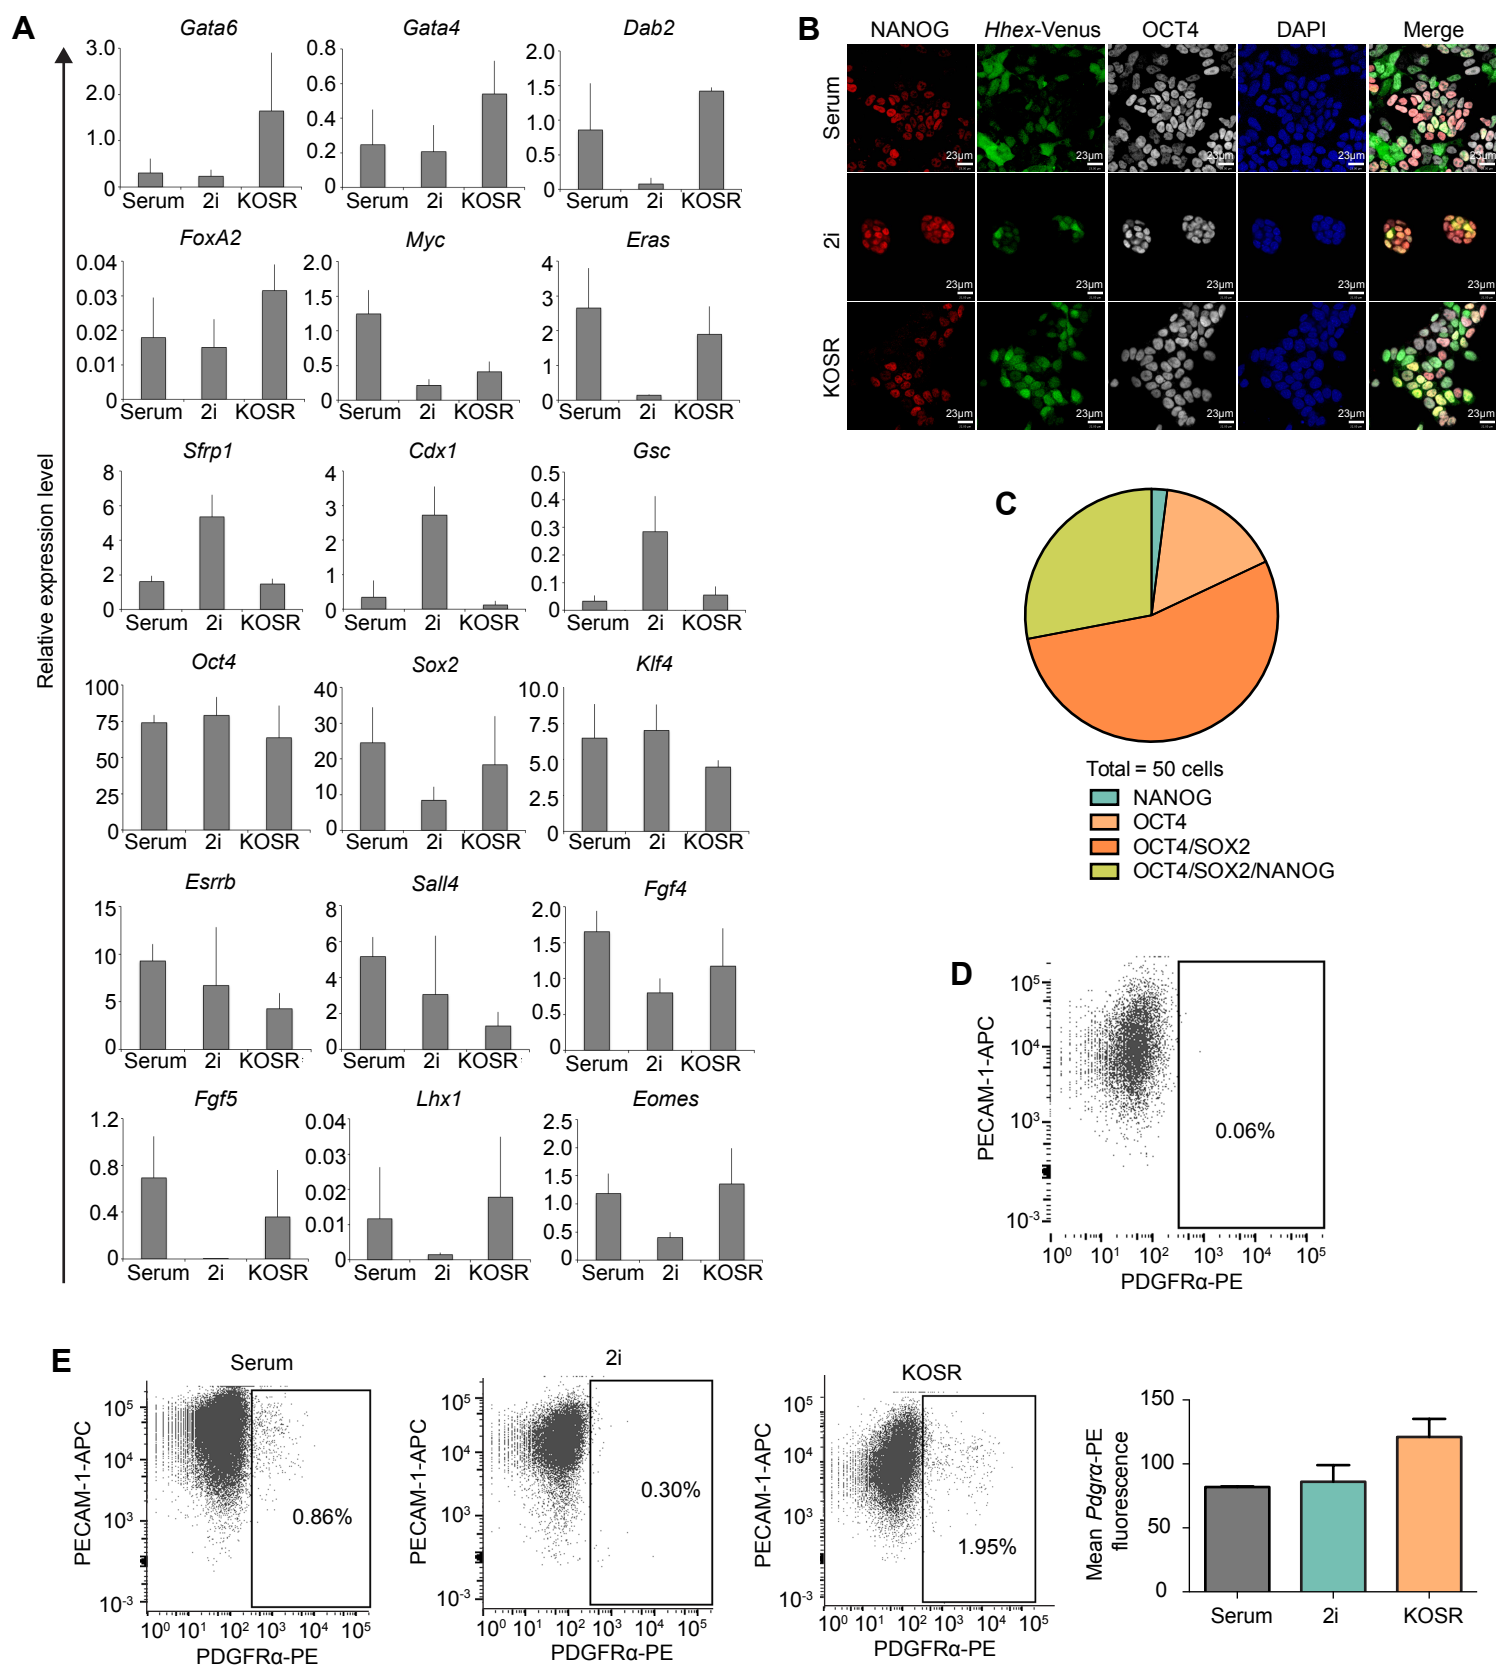

Figure S3  
Martin-Gonzalez et al., 2015

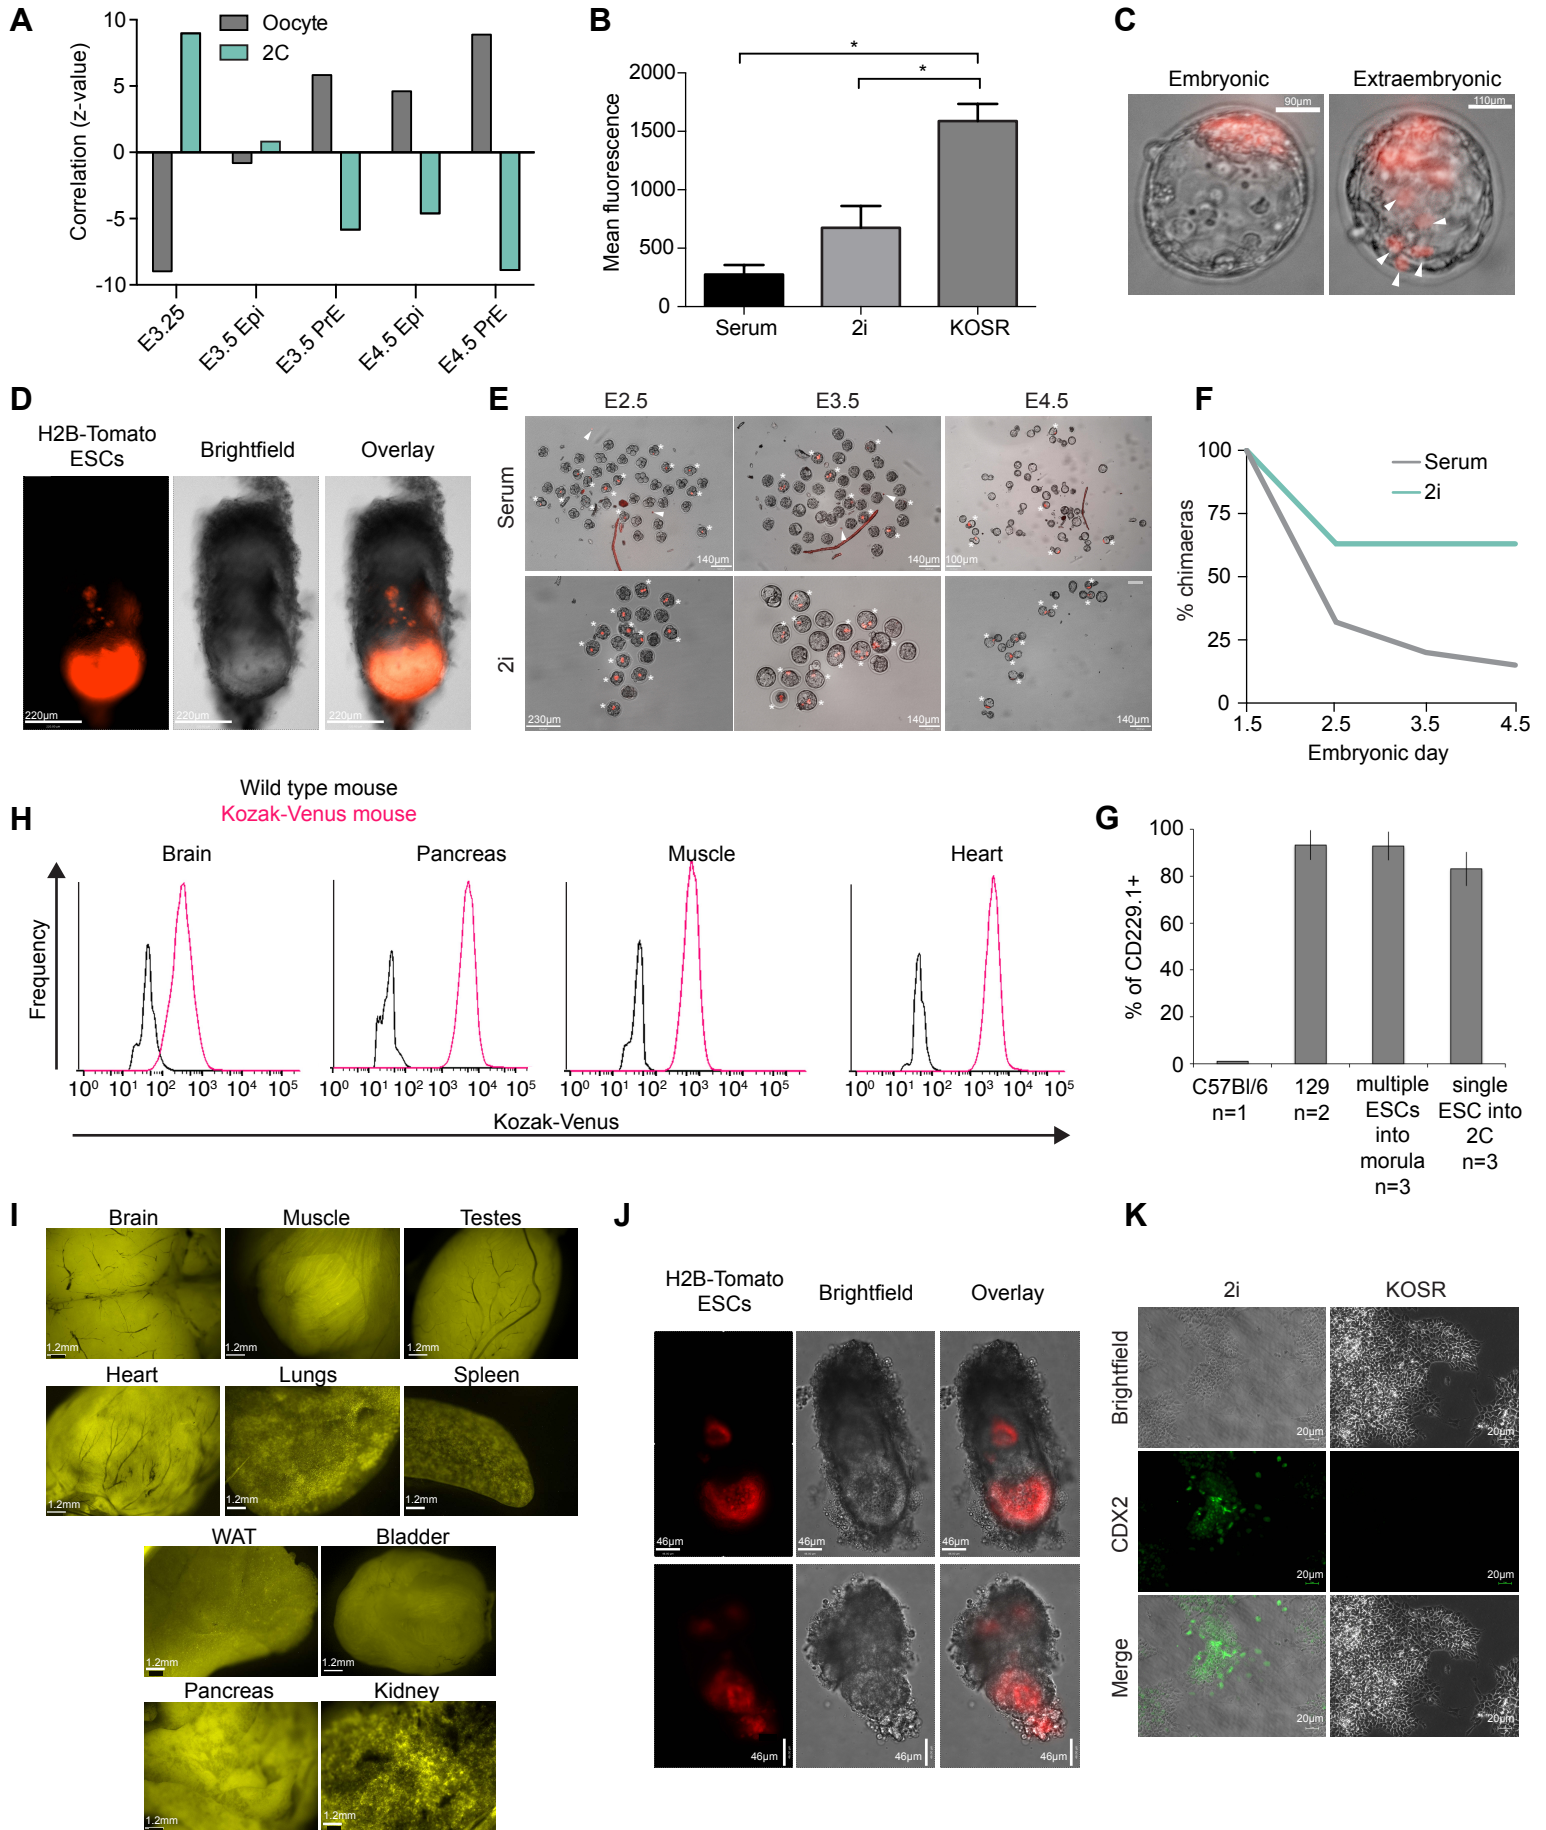

### Supplementary figures legends

**Figure S1. The injection of multiple ESCs into morulae generates 100% ESC-derived mice from all conditions, related to Fig 1.** ESCs, were derived (D) in and cultured (C) under various conditions; D in serum and C in serum, D in serum and C in 2i, D in 2i and C in 2i, D in 2i, C in serum and D and C in KOSR and D in KOSR and C in serum. **A.** Representative images of internal organs from mice generated by injection of multiple (5) Kozak-Venus ESCs into 8-cell morulae, alongside control wild type organs not expressing Kozak-Venus. WAT = white adipose tissue. **B.** Flow cytometry of internal organs from control wild type mice and mice generated by the injection of 2i-cultured Kozak-Venus ESCs. **C.** Representative images of Alkaline Phosphatase staining categories used for quantification in Fig. 1C-F. Colonies were scored as 100% differentiated or undifferentiated or as mixed colonies containing both undifferentiated and differentiated cells. **D.** Graph showing the proliferation rates of ESCs cultured in serum, 2i or KOSR over 96 hours of culture. n = 3. Error bars represent s.e.m.

**Figure S2. Characterisation of KOSR-cultured ESCs, related to Fig. 2.** **A.** qRT-PCR was carried out on ESCs cultured in serum, 2i or KOSR for 3 passages. Data represents the mean of n = 3 biological repeats from independent cell lines. Error bars indicate s.d. of the mean. Data is shown relative to the geometric mean of 3 housekeeping genes, *Gapdh*, *Tbp* and *Pgk1*. Consistent with previous observations (Marks et al., 2012; Morgani et al., 2013), genes including *Sfrp1*, *Cdx1* and *Gsc* were upregulated specifically in response to 2i culture, and the serum-dependent genes *Myc* and *Eras* were reduced to varying degrees in both serum-free conditions. **B.** Confocal optical sections of *Hhex*-Venus ESCs cultured in serum, 2i and KOSR immunostained for NANOG and OCT4. **C.** Quantification of immunostaining shown in Fig. 2F. 25 fields of view (n = 50 GATA6<sup>+</sup> cells) were randomly chosen to manually quantify the coexpression of GATA6 in the ESC compartment with 3 pluripotency-associated markers, NANOG, OCT4 and SOX2. **D.** Flow cytometry profile of ESCs in the absence of PDGFR $\alpha$  staining, used as a control to set gates for PDGFR $\alpha$  staining in Fig. S2E. **E.** Flow cytometry profiles of ESCs cultured in serum, 2i or KOSR for 3 passages before being immunostained for the PrE marker PDGFR $\alpha$  and the ESC marker PECAM-1. Gates are based on ESCs unstained for PDGFR $\alpha$  (Fig. S2D). Percentages of PDGFR $\alpha$ <sup>+</sup> cells are shown on the plots. Bar chart shows quantification of mean fluorescence in each condition. n = 2. Error bars indicate s.d. of the mean.

**Figure S3. 100% ESC-derived mice are generated from the injection of single 2i or KOSR-cultured ESCs into 2C embryos, related to Fig. 3.** **A.** Graph showing the correlation of published expression data from oocytes and 2C embryos (Macfarlan et al., 2012) with various stages of blastocyst development (Hiiragi et al., 2014). **B.** Mean fluorescence measured by flow cytometry of *Zscan4-Emerald* ESCs cultured in serum, 2i and KOSR (flow

cytometry profiles in Fig. 3B).  $y$   $n = 2$ . Error bars indicate s.d. of the mean. \*  $P \leq 0.05$ . **C.** Representative images of chimaeric blastocysts generated by the injection of single ESCs into 2C embryos, showing ESC contribution (marked by H2B-Tomato) to the embryonic epiblast alone or both the embryonic and extraembryonic lineages. Arrowheads indicate ESCs contributing to the extraembryonic regions. **D.** 129 ESCs expressing a constitutive H2B-Tomato marker were cultured in 2i for at least 3 passages before single HV<sup>+</sup> ESCs were sorted by FACS and injected into morulae. Embryos were then dissected and imaged at E6.5. **E.** ESCs constitutively expressing H2B-Tomato were pre-cultured in 2i or serum. Single ESCs were injected into 2C embryos. Time course showing the loss of serum-cultured ESCs from embryos. Asterisks mark chimaeric embryos and arrowheads show eliminated cells. **F.** Quantification of the percentage of chimaeric embryos at each stage in E. **G.** Flow cytometry of disaggregated spleens from control C57BL/6 and 129 mice as well as from chimaeric mice generated using C57BL/6 host embryos injected with 129 ESCs. Data are shown for 2i-cultured ESCs. Single ESCs injected into 2C embryos compared to multiple ESCs injected into morula. Disaggregated cells were immunostained for the 129 cell surface antigen CD229.1.  $n$  values indicate the number of mice analysed. **H.** Flow cytometry of internal organs from control and Kozak-Venus mice from Fig. S3G. **I.** Representative images of internal organs from mice generated by injection of a single Kozak-Venus ESC into a 2C embryo. WAT = white adipose tissue. **J.** E6.5 chimaeric embryos generated by the injection of multiple (5) KOSR-cultured ESCs, expressing a constitutive H2B-Tomato marker, into morulae.  $n = 8/18$  chimaeras (44%) from KOSR-cultured ESCs demonstrated contribution to both embryonic and extraembryonic lineages. **K.** ESCs were pre-cultured in serum, 2i or KOSR for 3 passages then switched to TS cell medium for 3 passages. Images show representative colonies. ESCs that were pre-cultured in serum did not survive after passage 2.

**Table S1. List of genes significantly upregulated in 2i compared to serum ESC cultures, related to Fig. 2.** Pair-wise comparisons (FDR  $\leq 0.05$ , fold-change  $\geq 2$ ) were performed between serum and 2i ESC cultures to reveal significant changes in gene expression. Table shows 1445 genes significantly upregulated in 2i.

**Table S2. List of genes significantly downregulated in 2i compared to serum ESC cultures, related to Fig. 2.** Pair-wise comparisons (FDR  $\leq 0.05$ , fold-change  $\geq 2$ ) were performed between serum and 2i ESC cultures to reveal significant changes in gene expression. Table shows 2248 genes significantly downregulated in 2i.

**Table S3. List of genes significantly upregulated in KOSR compared to serum ESC cultures, related to Fig. 2.** Pair-wise comparisons (FDR  $\leq 0.05$ , fold-change  $\geq 2$ ) were performed between serum and KOSR ESC cultures to reveal significant changes in gene expression. Table shows 536 genes significantly upregulated in KOSR.

**Table S4. List of genes significantly downregulated in KOSR compared to serum ESC cultures, related to Fig. 2.** Pair-wise comparisons (FDR  $\leq 0.05$ , fold-change  $\geq 2$ ) were performed between serum and 2i ESC cultures to reveal significant changes in gene expression. Table shows 482 genes significantly downregulated in KOSR.

**Table S5. Gene ontology analysis of genes upregulated in 2i compared to serum ESC cultures, related to Fig. 2.** Gene ontology analysis was performed using the Gene Ontology Consortium online tool. The set of genes was identified using criteria: FDR  $\leq 0.05$ , fold-change  $\geq 2$ .

**Table S6. Gene ontology analysis of genes downregulated in 2i compared to serum ESC cultures, related to Fig. 2.** Gene ontology analysis was performed using the Gene Ontology Consortium online tool. The set of genes was identified using criteria: FDR  $\leq 0.05$ , fold-change  $\geq 2$ .

**Table S7. Gene ontology analysis of genes upregulated in KOSR compared to serum ESC cultures, related to Fig. 2.** Gene ontology analysis was performed using the Gene Ontology Consortium online tool. The set of genes was identified using criteria: FDR  $\leq 0.05$ , fold-change  $\geq 2$ .

**Table S8. Gene ontology analysis of genes downregulated in KOSR compared to serum ESC cultures, related to Fig. 2.** Gene ontology analysis was performed using the Gene Ontology Consortium online tool. The set of genes was identified using criteria: FDR  $\leq 0.05$ , fold-change  $\geq 2$ .

**Table S9. List of significantly changing genes that are overlapping between 2i and KOSR ESC cultures, related to Fig. 2.** Pair-wise comparisons (FDR  $\leq 0.05$ , fold-change  $\geq 2$ ) were performed between both serum and 2i and serum and KOSR ESC cultures and significantly up and downregulated genes were identified. From these 2 comparisons, the overlapping genes were identified.

**Table S10. Gene ontology analysis of common up and downregulated genes in 2i and KOSR compared to standard serum cultures, related to Fig. 2.** Gene ontology analysis was performed using the Gene Ontology Consortium online tool. The set of genes was identified using criteria: FDR  $\leq 0.05$ , fold-change  $\geq 2$ .

## **Extended Experimental Procedures**

**qRT-PCR primer details, related to Experimental Procedures.** Primer sequences and the corresponding UPL probe used in this study.

| Gene            | Forward Primer          | Reverse Primer           | UPL Probe |
|-----------------|-------------------------|--------------------------|-----------|
| <i>Cdx1</i>     | ACGCCCTACGAATGGATG      | TGTCCTTGGTTCGGGTCTTA     | 70        |
| <i>Dab2</i>     | GCAGTCGAACTTTCTGGATCTC  | GGTGTTACTGGGACCGTACCT    | 51        |
| <i>Eomes</i>    | ACCGGCACCAAACCTGAGA     | AAGCTCAAGAAAGGAAACATGC   | 9         |
| <i>Eras</i>     | GCCCCTCATCAGACTGCTAC    | GCAGCTCAAGGAAGAGGTGT     | 99        |
| <i>Esrrb</i>    | CAGACAGGGGACTGTCCAG     | ACATTCGGTTCAGCAGCA       | 25        |
| <i>Fgf4</i>     | GCAAGCTCTTCGGTGTGC      | CGTAGGATTCGTAGGCGTTG     | 29        |
| <i>Fgf5</i>     | CATCACATTCCCGAATTAAGC   | CATCACATTCCCGAATTAAGC    | 29        |
| <i>FoxA2</i>    | GAGCAGCAACATCACCACAG    | CGTAGGCCTTGAGGTCCAT      | 77        |
| <i>Gata4</i>    | TTCGCTGTTTCTCCCTCAAG    | CAATGTTAACGGGTTGTGGA     | 60        |
| <i>Gata6</i>    | GGTCTCTACAGCAAGATGAATGG | TGGCACAGGACAGTCCAAG      | 40        |
| <i>Gsc</i>      | GGAGACGAAGTACCCAGACG    | CGGCGGTTCTTAAACCAG       | 32        |
| <i>Klf4</i>     | CGGGAAGGGAGAAGACACT     | GAGTTCCTCACGCCAACG       | 62        |
| <i>Lhx1</i>     | CAGGAGACTGGCCTCAACAT    | GTTTCATCCTTCGCTCCTTG     | 85        |
| <i>Myc</i>      | CCTAGTGCTGCATGAGGAGA    | TCTTCCTCATCTTCTTGCTCTTC  | 77        |
| <i>Nanog</i>    | CCTCCAGCAGATGCAAGAA     | GCTTGCACTTCATCCTTTGG     | 25        |
| <i>Oct4</i>     | GTTGGAGAAGGTGGAACCAA    | CTCCTTCTGCAGGGCTTTC      | 95        |
| <i>Sall4</i>    | TCTCCCGAGGGTCACAAG      | TGTGCTCGGATAAATGTTGG     | 75        |
| <i>Serpine2</i> | TTGGGTCAAAAATGAGACCAG   | CCTTGAAATACACTGCATTAACGA | 64        |
| <i>Sfrp1</i>    | AGGCTGCCCTCTTAATACACC   | CCACAGCACATGCACAGAG      | 97        |
| <i>Sox2</i>     | GGCAGAGAAGAGAGTGTTC     | TCTTCTTCTCCAGCCCTA       | 34        |
